# Supplementary material
Source: PubMed Central journal article supplement (PMC6378930)
Supplement: bty684_supplemental_material.pdf [file bty684_supplemental_material.pdf]

Supplemental Material for:

## **PredMP: a web server for *de novo* prediction and visualization of membrane proteins**

Sheng Wang<sup>1,†,\*</sup>, Shiyang Fei<sup>3,†</sup>, Zongan Wang<sup>4,†</sup>, Yu Li<sup>1</sup>, Jinbo Xu<sup>5</sup>, Feng Zhao<sup>2,\*</sup> and Xin Gao<sup>1,\*</sup>

<sup>1</sup>Computational Bioscience Research Center (CBRC), Computer, Electrical and Mathematical Sciences and Engineering (CEMSE) Division, King Abdullah University of Science and Technology (KAUST), Saudi Arabia.

<sup>2</sup>Prospect Institute of Fatty Acids and Health, Qingdao University, China. <sup>3</sup>COMPASS, New York, USA. <sup>4</sup>Department of Chemistry, University of Chicago, USA. <sup>5</sup>Toyota Technological Institute at Chicago, USA.

†Contribute equally.

\*To whom correspondence should be addressed: [sheng.wang@kaust.edu.sa](mailto:sheng.wang@kaust.edu.sa), [fengzhao21c@163.com](mailto:fengzhao21c@163.com) or [xin.gao@kaust.edu.sa](mailto:xin.gao@kaust.edu.sa).

---

## **Contents**

|                                                        |    |
|--------------------------------------------------------|----|
| S1 Basic workflow of PredMP .....                      | 2  |
| S2 Dataset of non-redundant membrane proteins .....    | 3  |
| S3 Transmembrane region prediction by DeepCNF .....    | 5  |
| S4 Blind test of membrane protein cases in CAMEO ..... | 7  |
| S5 Estimation of the 3D modeling accuracy.....         | 18 |
| S6 Input/output explanation of the PredMP server ..... | 19 |
| References .....                                       | 22 |

# S1 Basic workflow of PredMP

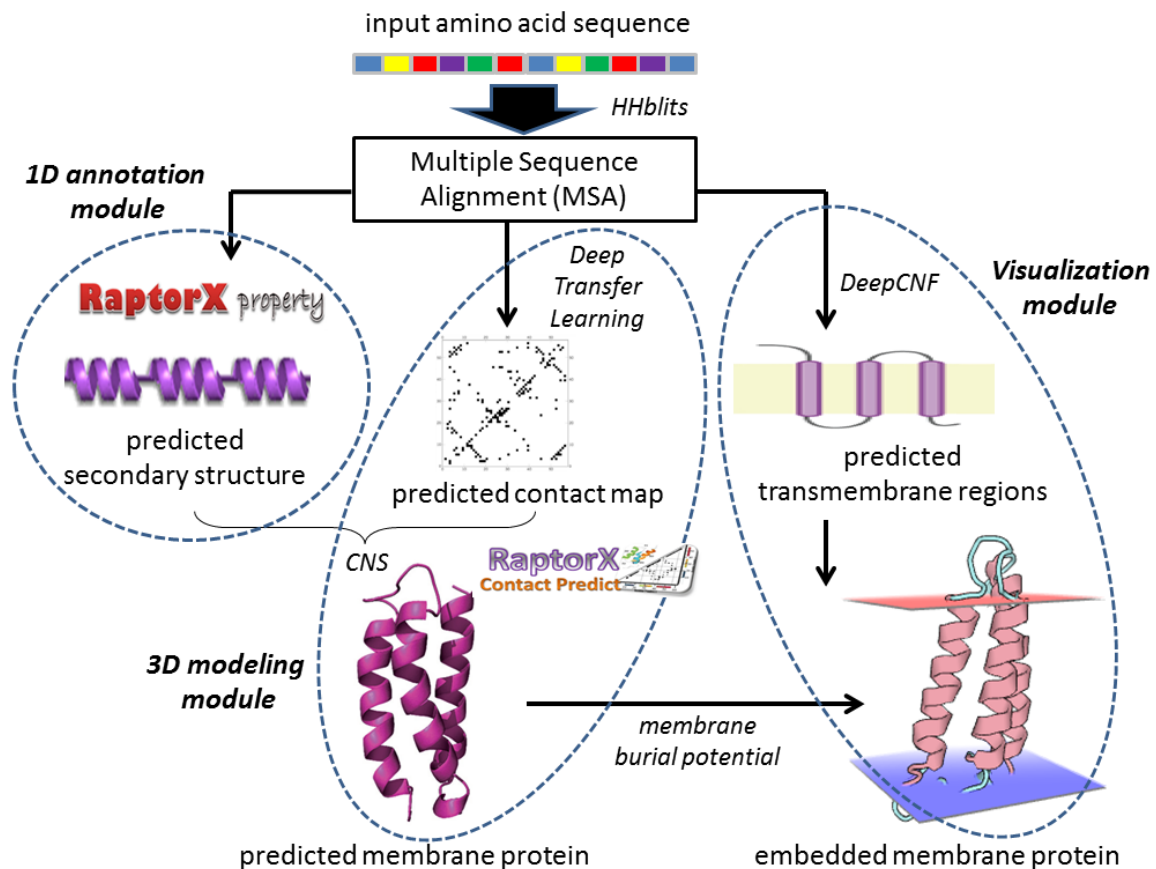

**Supplementary Figure S1. Illustration of the workflow of PredMP with three modules.** Given an input membrane protein sequence, PredMP first uses HHblits [1] to generate the multiple sequence alignment (MSA). The MSA is used to (a) predict transmembrane regions by DeepCNF model, (b) predict secondary structure by RaptorX-Property server [2] through evolutionary analysis (i.e., the **1D annotation module**), and (c) predict the contact map through Deep Transfer Learning (DTL) with co-evolutionary features [3]. The predicted secondary structure and contacts are fed into Crystallography & NMR System (CNS) suite [4] to *de novo* fold the 3D models by RaptorX-Contact server [5] (i.e., the **3D modeling module**), which are then embedded into the bilayer membrane with the guide of predicted transmembrane regions and a depth- and residue-dependent membrane burial potential [6] in the **visualization module**.

## S2 Dataset of non-redundant membrane proteins

**Supplemental Table S1.** A list of 510 non-redundant membrane proteins with solved structures in Protein Data Bank (PDB) from PDBTM database [7]. The entries highlighted with the bold (bold + underline) font indicate the model with TM-score larger than 0.5 (0.6). The entries shown in blue (italic) indicate the barrel membrane proteins (single-pass helical transmembrane proteins), whereas the others are multi-pass helical transmembrane proteins. Users may refer to the link <http://predmp.com/#/detail/1xxxA> to check the details of the PredMP predictions, where 1xxxA is the membrane protein id (PDB ID: 1xxx plus Chain ID: A).

1a0sP 1pw4A 2evuA 2ln1A *2wpvB* 3cn5A 3kvnA *3udcA* *4chvA* 4il3A 4or2A 4wgvA *5c8jI*  
1ar1B 1q16C 2f1cX *2lomA* *2wsc1* 3cx5C 3111A 3ug9A 4cskA *4in5H* 4p6vB 4wmzA *5cfbA*  
*1bccE* *1q90A* *2f93B* *2loqA* *2wsc3* 3d31C *3lnmB* *3ukmA* 4czbA 4in5L 4p6vC 4x5mA 5ctgA  
*1bctA* 1q90B *2f95B* *2lorA* *2wscF* 3ddlA *3lw54* *3um7A* 4d5bA 4j05A 4p6vD *4xk83* 5d0yA  
1bhaA *1qcrD* 2fynB *2losA* *2wscG* 3dhwA *3lw5H* *3uq7A* 4d6tD 4j72A 4p6vE 4xnkA 5dirA  
*1c17M* 1qd6C 2ge4A *2lotA* *2wscH* *3dinE* 3m71A 3ux4A *4d6tG* 4j7cI 4p6vF 4xnvA 5doqA  
1e7pC 1qleC *2gfpA* *2lp1A* *2wscK* 3d18C 3mk7A 3v2wA *4d6tJ* 4jkvA 4p79A *4xu4A* 5doqB  
*1ehkB* *1rh5B* 2gr7A *2m0qA* *2wscL* *3dl8E* *3mk7B* 3v5sA *4d6uD* 4k1cA 4pgrA 4xxjA 5ee7A  
1fftB 1rh5C 2gr8A *2m20A* 2swA 3dwoX *3mk7C* 3vmqA 4djiA 4kjrA *4phzA* *4xydB* *5ek0A*  
1fftC *1rwtA* *2h8aA* *2m67A* *2wwbB* *3dwwA* 3mktA 3vouA 4dojA 4knfA *4pirA* 4y25A 5ekeA  
1fw2A *1s51B* 2h8pC *2m6bA* *2wwbC* 3dzmA *3mp7A* *3vr8C* 4dveA 4kppA 4px7A *4y28G* 5eulE  
1fx8A *1s51E* 2hdfA *2m7gA* 2x4mA 3effK 3mp7B 3vr8D *4dxwA* *4kt0F* 4q2eA *4y28K* 5ezmA  
1qzmA 1s51X *2ibzG* *2m8rA* 2xq2A 3eh3A 3njtA 3vwiA 4eltA *4kt0K* 4qncA 4y28L *5flcA*  
*1h2sB* *1sqqK* *2ibzI* 2mafa 2xuta 3ejzA *3nymA* 3wdoA 4ea3A *4ky0A* 4qndA *4y7jA* *5fn2B*  
1h6s1 1t16A 2iubA *2mfrA* 2y5yA 3emnX 3o0rB 3wmfA 4ezcA 4l6rA 4qtnA 4ymkA *5gaeh*  
*1iz1A* 1tlwA *2j58A* 2mgyA *2y69D* 3emoA 3o7pA *3wmm1* 4f35A *4l6v6* 4quvA 4ymsC *5gaqA*  
*1iz1C* 1tqqA *2j7aC* *2mm8A* *2y69G* 3fhhA 3ohnA *3wmmM* 4f41A 4l6v8 4r1iA 4ytpC 5garO  
*1jb0K* 1uunA 2jafA *2mmuA* *2y69I* 3fida 3orgA *3wo7A* 4fqeA 4ltoA *4rdqA* 4ytpD *5hk1A*  
1k24A 1uynX 2jlnA *2mn6A* *2y69J* 3g67A 3oufA *3wvfA* 4fuvA 4m58A 4rfsS 4z34A *5ilmV*  
1kf6C *1vclA* *2jo1A* *2mpnA* *2y69K* 3gi8C 3p5nA 3wxvA 4gluA 4m64A *4ri2A* 4z3nA 5i20A  
1kf6D *1vf5B* *2jp3A* 2mxbA *2y69L* 3hd6A *3pjsK* 3x29A 4g7vS 4mbsA 4rjwA 4z7fA 5i32A

*1kqfB* *1vf5D* [2k01A](#) *2n4xA* *2y69M* [3hw9A](#) [3pjzA](#) *3x2rA* [4g80I](#) [4meeA](#) [4rl8A](#) [4zp0A](#) [5i6cA](#)  
[1kqfC](#) *1wrgA* *2k21A* [2n61A](#) *2yevB* [3iyzA](#) [3pwhA](#) [3x3bA](#) [4gbyA](#) [4mndA](#) [4rl9A](#) [4zr0A](#) [5i6zA](#)  
*1kzuA* [1xioA](#) [2k73A](#) [2n7qA](#) *2yevC* *3iz1A* [3q7kA](#) *3ze3A* [4gd3A](#) [4mqsA](#) [4rlcA](#) [4zr1A](#) *5id3A*  
*1lghA* *1xl4A* *2k9pA* [2nmrA](#) [2yiuA](#) *3j08A* [3qe7A](#) [3zevA](#) *4gx5A* [4mt4A](#) [4rngA](#) [4zw9A](#) [5iofA](#)  
[1m56B](#) [1yc9A](#) *2kluA* [2nq2A](#) [2ynkA](#) *3j1zP* *3qnqA* [3zjzA](#) *4gycB* [4n74A](#) *4rp8A* *5alsA* *5irxA*  
[1m56D](#) *1yewC* *2kogA* [2nr9A](#) [2z73A](#) [3j9tR](#) [3qraA](#) *3zk1A* [4h33A](#) [4n75A](#) [4ryiA](#) [5a40A](#) [5ivaA](#)  
[1m57A](#) [1yq3C](#) [2ks9A](#) *2nrgA* [2ziyA](#) [3jbrE](#) *3rbzA* [3zuxA](#) *4he8A* [4njnA](#) *4s0vA* [5a63C](#) *5iwsA*  
[1mm4A](#) [1yq3D](#) *2ksdA* *2o01F* [2zjsE](#) *3jcuD* [3rgwS](#) *4a2nB* [4he8C](#) *4nppA* [4tkrA](#) [5a63D](#) [5ixmB](#)  
[1mprA](#) *1zrtE* *2kseA* *2oarA* *2zxeB* *3jcuH* *3rkoA* [4atvA](#) *4he8D* [4ntjA](#) [4tq3A](#) [5a6eB](#) [5jagA](#)  
*1n71A* *1zzaA* *2ksfA* [2pnoA](#) *2zxeG* *3jcuK* [3rkoB](#) [4aw6A](#) [4hkrA](#) *4nykA* [4tquM](#) *5abbZ*  
[1nekC](#) *2a01A* [2ksrA](#) [2q67A](#) [3a2sX](#) *3jcuR* [3rkoC](#) *4b4aA* [4hqjE](#) *4o6mA* [4tquN](#) *5araT*  
[1nekD](#) [2a9hA](#) *2kyhA* [2q7mA](#) [3a7kA](#) *3jcuS* [3rkoD](#) [4bemJ](#) [4httA](#) [4o6yA](#) *4twkA* [5araW](#)  
[1o5wA](#) *2akhA* *2l35A* [2gomA](#) *3anzA* *3jcuW* *3rkoF* *4bgnA* [4hugS](#) *4o9pA* [4u15A](#) [5awwG](#)  
*1occD* *2akhB* *2l8sA* *2r6gF* [3b4rA](#) [3jcuX](#) [3rkoG](#) *4bog3* [4huqT](#) [4o9pB](#) [4u4tA](#) *5awwY*  
*1oedC* *2bg9A* [2lckA](#) [2r6gG](#) *3b5dA* [3jcuZ](#) *3s0xA* *4bpmA* *4hw9A* *4o9uB* [4u91A](#) [5awzA](#)  
*1orsC* [2bl2A](#) [2lhfA](#) [2vpwC](#) [3b9wA](#) *3jycA* [3sljA](#) [4bwzA](#) *4hycA* [4od4A](#) [4uc1A](#) [5aymA](#)  
[1p49A](#) *2cpbA* *2lkgA* [2wlpA](#) [3bryA](#) [3k3fA](#) [3sybA](#) [4c9jA](#) [4hyoA](#) *4ogqC* [4us3A](#) [5azbA](#)  
[1p4tA](#) [2d57A](#) *2llyA* [2wjqA](#) *3chxB* [3kj6A](#) *3tijA* [4cadC](#) [4hzuS](#) [4oh3A](#) [4v1fA](#) *5bwkE*  
*1p7bA* [2ervA](#) [2lmeA](#) [2wpdJ](#) *3chxC* *3kp9A* [3tx3A](#) *4cfgA* *4iffA* [4oo9A](#) [4wd7A](#) [5c6oA](#)

## S3 Transmembrane region prediction by DeepCNF

To train a machine learning model for predicting the transmembrane region at each residue given a protein primary sequence, we performed the following procedures. We first collected 510 non-redundant transmembrane proteins (shown in Table S1) at the chain level from PDBTM [7]. To label each residue from a given transmembrane protein sequence, we used the following 9 labels extracted from PDBTM: 1 (Side1), 2 (Side2), B (Beta-strand), H (alpha-helix), C (coil), I (membrane-inside), L (membrane-loop), F (interfacial helix), and U (unknown localizations). We then trained a deep learning model, DeepCNF [8, 9], on this annotated sequence dataset.

As shown in Figure S2, DeepCNF has two modules: (i) the Conditional Random Fields (CRF) [10], and (ii) the Deep Convolutional Neural Network (DCNN) [11]. DeepCNF can model not only complex relationship between the sequence and transmembrane regions by a deep hierarchical architecture, but also interdependency between adjacent transmembrane region labels [9]. To deal with the imbalanced distribution of some transmembrane region labels, such as interfacial helix and membrane-inside, we trained DeepCNF by maximizing AUC [6]. According to [9], the DCNN architecture is set as follows: it consists of five layers where each layer has 100 neurons and the window size at each layer is set to 11.

We used the following 68 input features: 20 one-hot encoding from the primary sequence, 20 position specific scoring matrix (PSSM) from PSI-BLAST [12] with E-value threshold 0.001 and three iterations to search UniRef90 [13], 20 PSSM from HHblits [1] with E-value threshold 0.001 and three iterations to search UniProt20 [13], and 8 predicted eight-state secondary structure element by DeepCNF\_SS [9]. Note that although we used DeepCNF\_SS to generate the predicted secondary structure features for transmembrane region prediction, the training data for DeepCNF\_SS only come from non-MPs.

This method achieved 62% cross-validation predictive accuracy on classifying a residue into the nine categories of the transmembrane region. If we merged label B, H, and C as 'transmembrane region' label, and all other labels as 'non-transmembrane region' label, then this method could achieve 89% predictive accuracy, as well as AUC and AUPRC 0.94 and 0.89, respectively. Finally, using forward-backward algorithm in CRF [10], we assigned to each residue position a reliable 'transmembrane' or 'non-transmembrane' label based on the computed probability.

It should be noted that other transmembrane region (or, membrane protein topology) predictors could also be used here, such as TOPCONS [14], MEMSAT-SVM [15], PHOBIUS [16], or OCTOPUS [17], just name a few. We will add these third-party tools for predicting and visualizing transmembrane regions in the next release version of PredMP.

Last but not least, this transmembrane region prediction module will be added to RaptorX-Property [2] in the near future. Currently, users may refer to the source code at GitHub [https://github.com/realbigws/RaptorX\\_Property\\_Fast](https://github.com/realbigws/RaptorX_Property_Fast).

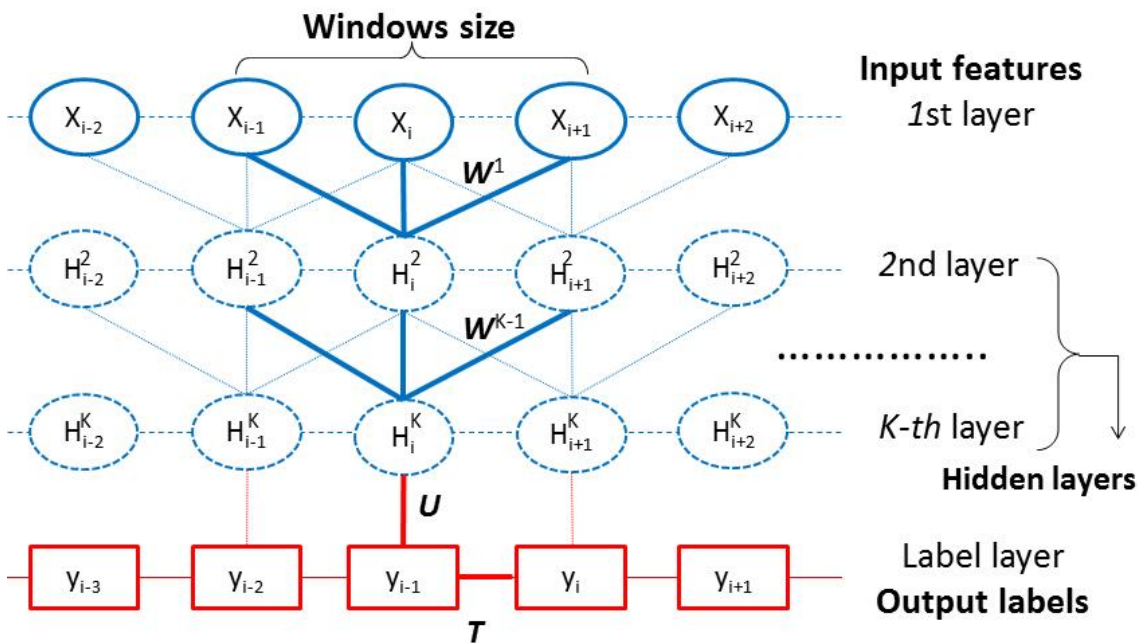

**Supplemental Figure S2. Illustration of DeepCNF.** Here  $i$  is the position index and  $X_i$  the associated input features,  $H^k$  represents the  $k$ -th hidden layer, and  $Y$  is the output label. All the layers from the 1<sup>st</sup> to the  $K$ <sup>th</sup> form a deep convolutional neural network (DCNN) with parameter  $W^k \{k=1,2,\dots,K\}$ , which is shown in blue. The  $K$ <sup>th</sup> layer and the label layer form a Conditional Random Fields (CRF), which is shown in red. The parameter  $U$  specifies the relationship between the  $K$ <sup>th</sup> layer and the label layer, and  $T$  the binary relationship between adjacent labels. This figure is taken from Wang S. *et. al.* [2].

## S4 Blind test of membrane protein cases in CAMEO

### *Blind and live test in CAMEO*

CAMEO [18] can be interpreted as a fully automated CASP [19], but has a smaller number (about 40) of participating servers since many CASP-participating servers are not fully automated. By “blind” it means that the experimentally solved structure of a test protein has not been released in PDB when it is used as a test target. By “live” it means that every weekend CAMEO releases about 20 sequences for prediction test. The test proteins used by CAMEO have no publicly available native structures before it finishes collecting models from servers. The CAMEO server ID of RaptorX-Contact (the main module in PredMP server to generate the 3D models) is Server60, and it has been fully functioning since September 2016.

Since experimentally solving the structures of membrane proteins (MPs) is challenging, starting from September 2016 and up to January 2018, we have observed 10 non-homologous MPs among all CAMEO hard targets, as shown in Table S2.

**Supplemental Table S2.** A list of 10 non-homologous membrane proteins among all CAMEO hard targets from Sep 2016 to Jan 2018.

5h35E (CAMEO ID: 2017-01-07\_00000030\_3)  
5jkiA (CAMEO ID: 2017-02-18\_00000075\_1)  
5l0wA (CAMEO ID: 2017-03-18\_00000059\_2)  
5khnA (CAMEO ID: 2017-06-10\_00000043\_1)  
5kymB (CAMEO ID: 2017-07-22\_00000026\_1)  
5mm0A (CAMEO ID: 2017-08-05\_00000083\_1)  
5gufA (CAMEO ID: 2017-10-07\_00000005\_1)  
5ogkH (CAMEO ID: 2017-11-18\_00000021\_1)  
6bmsB (CAMEO ID: 2018-01-06\_00000139\_1)  
5vkvA (CAMEO ID: 2018-01-27\_00000035\_1)

We show in the following sections that RaptorX-Contact successfully modeled all ten MPs belonging to the hard category of CAMEO.

|            | Long range accuracy |       |       |       | Medium range accuracy |       |       |       |
|------------|---------------------|-------|-------|-------|-----------------------|-------|-------|-------|
|            | L                   | L/2   | L/5   | L/10  | L                     | L/2   | L/5   | L/10  |
| Our method | 0.778               | 0.953 | 1.000 | 1.000 | 0.316                 | 0.547 | 0.905 | 1.000 |
| metaPSICOV | 0.571               | 0.774 | 0.929 | 1.000 | 0.245                 | 0.401 | 0.619 | 0.810 |
| Gremlin    | 0.340               | 0.528 | 0.786 | 0.810 | 0.137                 | 0.217 | 0.429 | 0.619 |

(A)

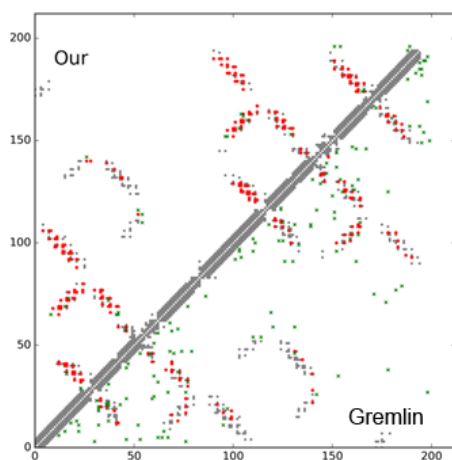

(B)

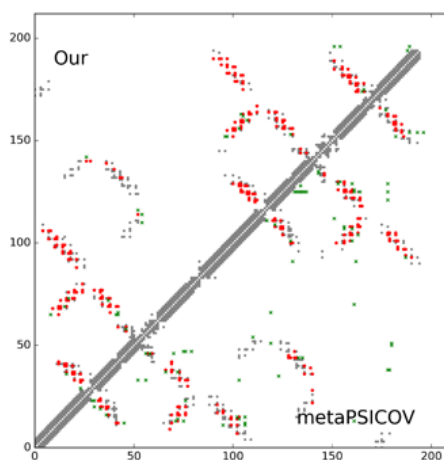

(C)

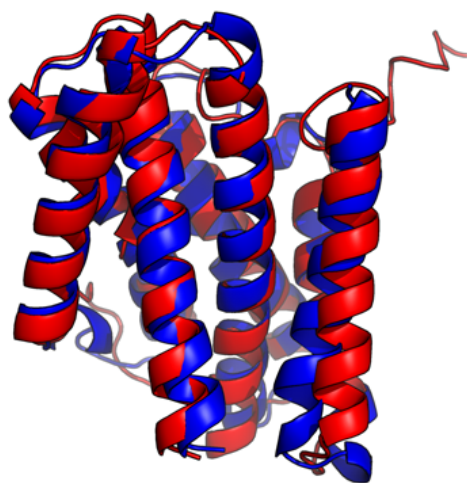

(D)

| Server Name | IDDT  | IDDT<br>C $\alpha$ |
|-------------|-------|--------------------|
| Server 60   | 62.88 | 72.17              |
| Server 19   | 53.06 | 57.93              |
| Robetta     | 52.70 | 57.53              |
| Server 45   | 48.38 | 53.44              |
| RaptorX     | 48.29 | 53.40              |

(E)

**Supplemental Figure S3.** Case study of CAMEO target 5h35E. This protein is an intracellular cation channel ortholog from *Sulfolobus solfataricus*. (A) The long- and medium-range contact prediction accuracy of our methods, MetaPSICOV, and Gremlin. (B-C) The overlap between the native contact map and contact maps predicted by our method, Gremlin, and MetaPSICOV. Top L predicted all-range contacts are displayed. A gray, red, and green dot represents a native contact, a correct prediction, and a wrong prediction, respectively. (D) The superimposition between our predicted model (in red) and the native structure (in blue). (E) The list of top models submitted by CAMEO servers and their quality scores.



|            | Long range accuracy |       |       |       | Medium range accuracy |       |       |       |
|------------|---------------------|-------|-------|-------|-----------------------|-------|-------|-------|
|            | L                   | L/2   | L/5   | L/10  | L                     | L/2   | L/5   | L/10  |
| Our method | 0.658               | 0.883 | 1.000 | 1.000 | 0.185                 | 0.351 | 0.659 | 0.864 |
| metaPSICOV | 0.554               | 0.820 | 0.977 | 1.000 | 0.158                 | 0.279 | 0.523 | 0.727 |
| Gremlin    | 0.495               | 0.703 | 0.773 | 0.818 | 0.131                 | 0.207 | 0.477 | 0.682 |

(A)

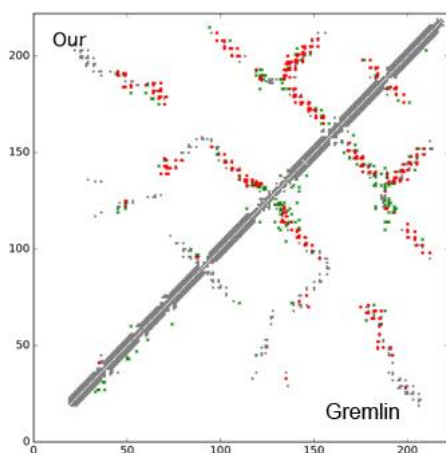

(B)

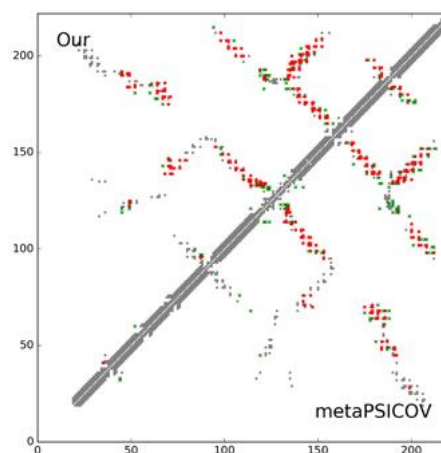

(C)

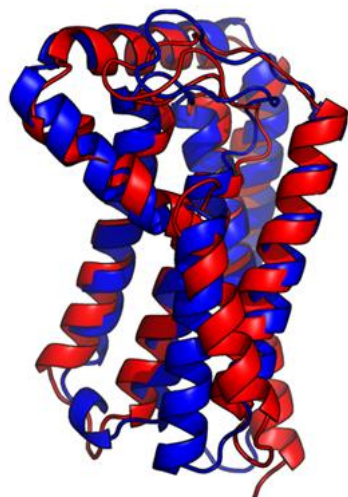

(D)

| Server Name | IDDT  | IDDT<br>C $\alpha$ |
|-------------|-------|--------------------|
| Robetta     | 60.26 | 70.05              |
| Server 60   | 56.05 | 67.03              |
| IntFOLD4-TS | 53.44 | 63.09              |
| Server 56   | 53.44 | 63.09              |
| Server 57   | 53.40 | 62.11              |

(E)

**Supplemental Figure S4.** Case study of CAMEO target 5jkiA. This protein is a transmembrane PAP2 type phosphatidylglycerolphosphate phosphatase from *Bacillus subtilis*. (A) The long- and medium-range contact prediction accuracy of our methods, MetaPSICOV, and Gremlin. (B-C) The overlap between the native contact map and contact maps predicted by our method, Gremlin, and MetaPSICOV. Top L predicted all-range contacts are displayed. A gray, red, and green dot represents a native contact, a correct prediction, and a wrong prediction, respectively. (D) The superimposition between our predicted model (in red) and the native structure (in blue). (E) The list of top models submitted by CAMEO servers and their quality scores.

|            | Long range accuracy |       |       |       | Medium range accuracy |       |       |       |
|------------|---------------------|-------|-------|-------|-----------------------|-------|-------|-------|
|            | L                   | L/2   | L/5   | L/10  | L                     | L/2   | L/5   | L/10  |
| Our method | 0.397               | 0.674 | 0.889 | 1.000 | 0.103                 | 0.207 | 0.444 | 0.778 |
| metaPSICOV | 0.250               | 0.391 | 0.528 | 0.722 | 0.098                 | 0.163 | 0.278 | 0.389 |
| Gremlin    | 0.087               | 0.109 | 0.222 | 0.333 | 0.016                 | 0.033 | 0.056 | 0.056 |

(A)

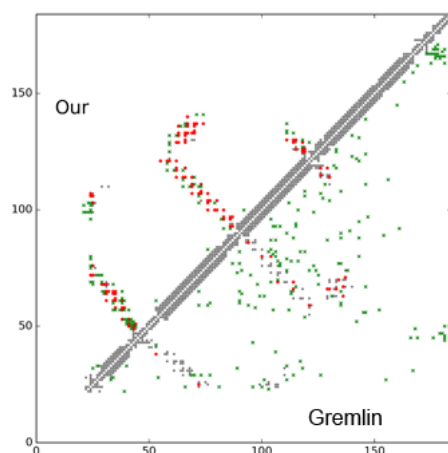

(B)

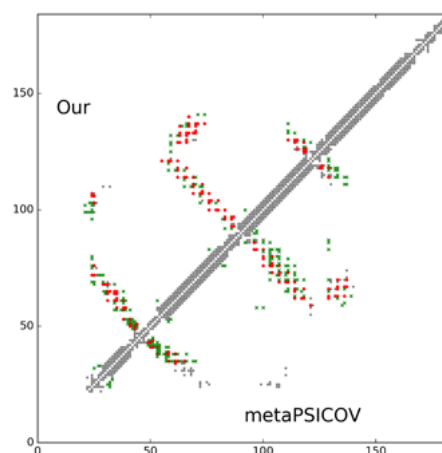

(C)

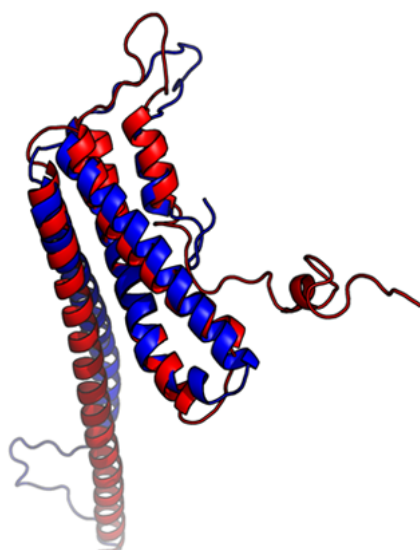

(D)

| Server Name        | IDDT  | IDDT Ca |
|--------------------|-------|---------|
| Server 60          | 60.34 | 74.87   |
| Robetta            | 46.71 | 56.46   |
| Princeton_TEMPLATE | 41.32 | 49.82   |
| RaptorX            | 38.53 | 46.49   |
| Server 56          | 37.81 | 47.04   |

(E)

**Supplemental Figure S5.** Case study of CAMEO target 510wA. This protein is a post-translational translocation Sec71/Sec72 complex from *Escherichia coli*. (A) The long- and medium-range contact prediction accuracy of our methods, MetaPSICOV, and Gremlin. (B-C) The overlap between the native contact map and contact maps predicted by our method, Gremlin, and MetaPSICOV. Top L predicted all-range contacts are displayed. A gray, red, and green dot represents a native contact, a correct prediction, and a wrong prediction, respectively. (D) The superimposition between our predicted model (in red) and the native structure (in blue). (E) The list of top models submitted by CAMEO servers and their quality scores.

|            | Long range accuracy |       |       |       | Medium range accuracy |       |       |       |
|------------|---------------------|-------|-------|-------|-----------------------|-------|-------|-------|
|            | L                   | L/2   | L/5   | L/10  | L                     | L/2   | L/5   | L/10  |
| Our method | 0.700               | 0.871 | 0.926 | 0.977 | 0.138                 | 0.245 | 0.500 | 0.750 |
| metaPSICOV | 0.297               | 0.426 | 0.602 | 0.750 | 0.076                 | 0.109 | 0.193 | 0.284 |
| Gremlin    | 0.254               | 0.388 | 0.585 | 0.704 | 0.063                 | 0.122 | 0.256 | 0.454 |

(A)

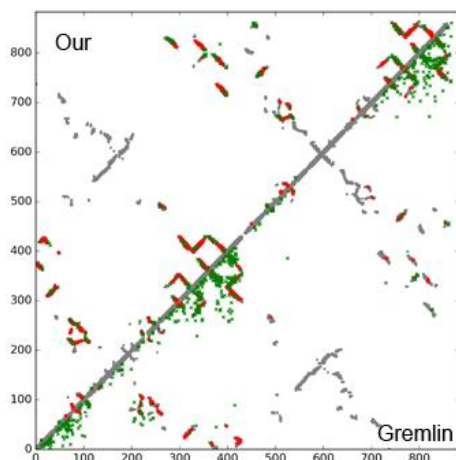

(B)

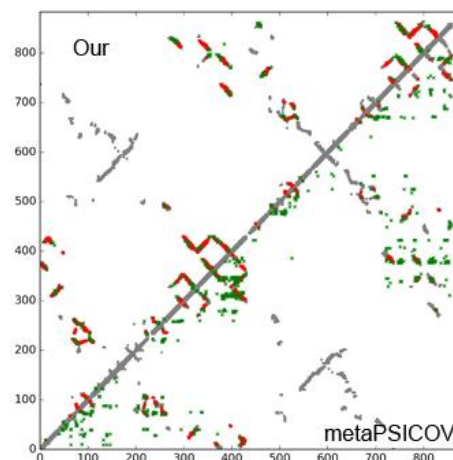

(C)

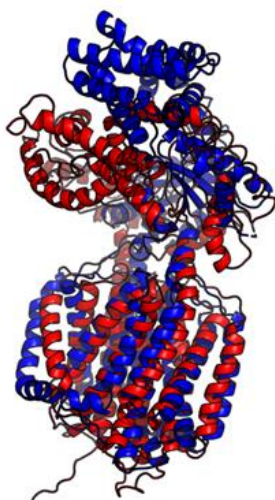

(D)

| Server Name | IDDT  | IDDT<br>C $\alpha$ |
|-------------|-------|--------------------|
| Server 60   | 41.19 | 48.39              |
| Robetta     | 41.97 | 47.43              |
| HHpredB     | 38.20 | 46.26              |
| Server 45   | 38.90 | 44.11              |
| RaptorX     | 38.71 | 43.87              |

(E)

**Supplemental Figure S6.** Case study of CAMEO target 5khnA. This protein is the Burkholderia multivorans hopanoid transporter HpnN. (A) The long- and medium-range contact prediction accuracy of our methods, MetaPSICOV, and Gremlin. (B-C) The overlap between the native contact map and contact maps predicted by our method, Gremlin, and MetaPSICOV. Top L predicted all-range contacts are displayed. A gray, red, and green dot represents a native contact, a correct prediction, and a wrong prediction, respectively. (D) The superimposition between our predicted model (in red) and the native structure (in blue). (E) The list of top models submitted by CAMEO servers and their quality scores.

|            | Long range accuracy |       |       |       | Medium range accuracy |       |       |       |
|------------|---------------------|-------|-------|-------|-----------------------|-------|-------|-------|
|            | L                   | L/2   | L/5   | L/10  | L                     | L/2   | L/5   | L/10  |
| Our method | 0.773               | 0.927 | 0.918 | 1.000 | 0.275                 | 0.472 | 0.673 | 0.667 |
| metaPSICOV | 0.534               | 0.748 | 0.939 | 0.958 | 0.231                 | 0.398 | 0.592 | 0.708 |
| Gremlin    | 0.563               | 0.780 | 0.837 | 0.917 | 0.142                 | 0.260 | 0.551 | 0.625 |

(A)

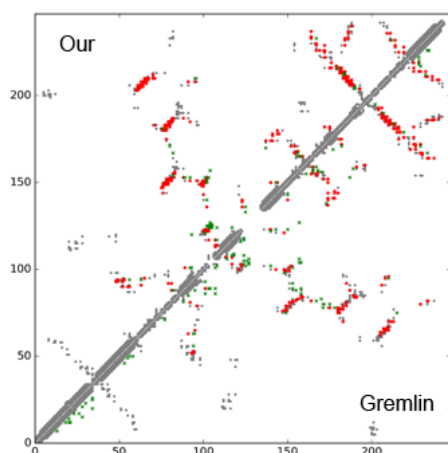

(B)

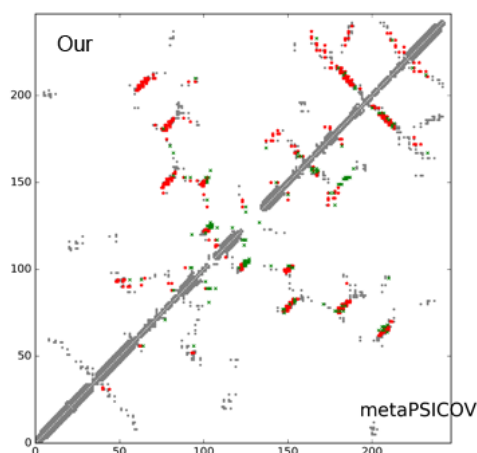

(C)

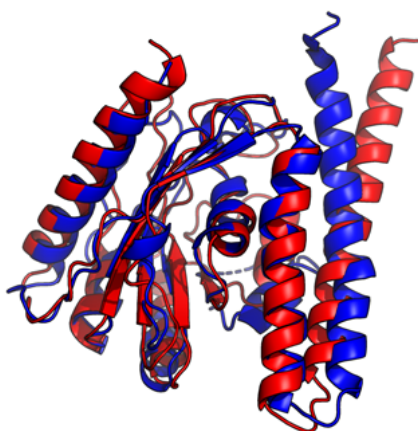

(D)

| Server Name | IDDT  | IDDT<br>C $\alpha$ |
|-------------|-------|--------------------|
| Robetta     | 57.27 | 66.08              |
| Server 60   | 53.28 | 63.62              |
| RaptorX     | 51.19 | 58.88              |
| Server 45   | 51.06 | 59.16              |
| IntFOLD3-TS | 50.60 | 59.44              |

(E)

**Supplemental Figure S7.** Case study of CAMEO target 5kymB. This protein is the 1-acyl-sn-glycerophosphate (LPA) acyltransferase, PlsC, from *Thermotoga maritima*. (A) The long- and medium-range contact prediction accuracy of our methods, MetaPSICOV, and Gremlin. (B-C) The overlap between the native contact map and contact maps predicted by our method, Gremlin, and MetaPSICOV. Top L predicted all-range contacts are displayed. A gray, red, and green dot represents a native contact, a correct prediction, and a wrong prediction, respectively. (D) The superimposition between our predicted model (in red) and the native structure (in blue). (E) The list of top models submitted by CAMEO servers and their quality scores.

|            | Long range accuracy |       |       |       | Medium range accuracy |       |       |       |
|------------|---------------------|-------|-------|-------|-----------------------|-------|-------|-------|
|            | L                   | L/2   | L/5   | L/10  | L                     | L/2   | L/5   | L/10  |
| Our method | 0.703               | 0.904 | 1.000 | 1.000 | 0.235                 | 0.412 | 0.784 | 0.946 |
| metaPSICOV | 0.398               | 0.652 | 0.838 | 0.973 | 0.163                 | 0.230 | 0.392 | 0.622 |
| Gremlin    | 0.436               | 0.604 | 0.784 | 0.838 | 0.174                 | 0.278 | 0.419 | 0.541 |

(A)

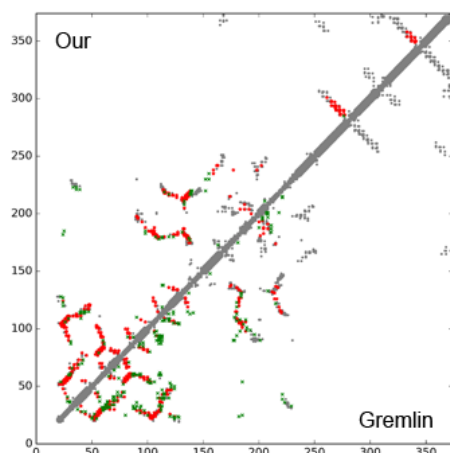

(B)

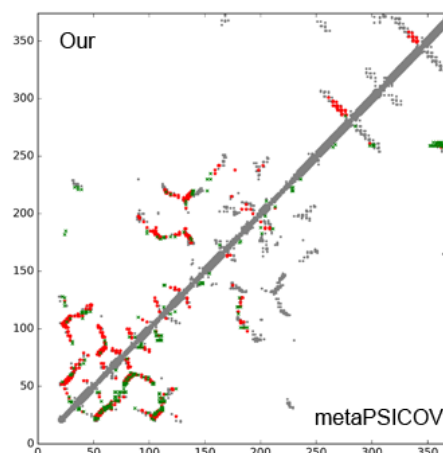

(C)

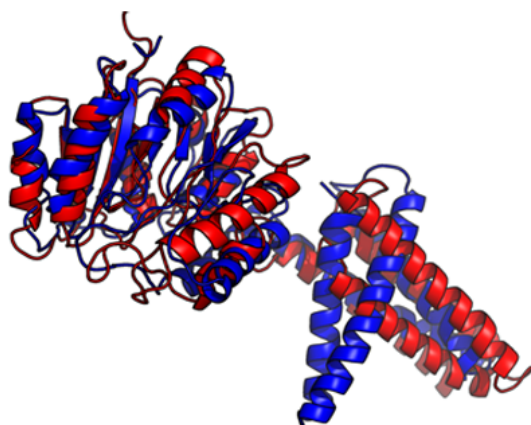

(D)

| Server Name | IDDT  | IDDT<br>C $\alpha$ |
|-------------|-------|--------------------|
| IntFOLD4-TS | 50.99 | 61.45              |
| Server 60   | 47.48 | 59.01              |
| Robetta     | 50.64 | 58.98              |
| HHpredB     | 46.49 | 58.53              |
| Server 55   | 48.69 | 56.69              |

(E)

**Supplemental Figure S8.** Case study of CAMEO target 5mm0A. This protein is a Dolichyl phosphate mannose synthase. (A) The long- and medium-range contact prediction accuracy of our methods, MetaPSICOV, and Gremlin. (B-C) The overlap between the native contact map and contact maps predicted by our method, Gremlin, and MetaPSICOV. Top L predicted all-range contacts are displayed. A gray, red, and green dot represents a native contact, a correct prediction, and a wrong prediction, respectively. (D) The superimposition between our predicted model (in red) and the native structure (in blue). (E) The list of top models submitted by CAMEO servers and their quality scores.

|            | Long range accuracy |       |       |       | Medium range accuracy |       |       |       |
|------------|---------------------|-------|-------|-------|-----------------------|-------|-------|-------|
|            | L                   | L/2   | L/5   | L/10  | L                     | L/2   | L/5   | L/10  |
| Our method | 0.593               | 0.835 | 1.000 | 1.000 | 0.280                 | 0.495 | 0.667 | 0.667 |
| metaPSICOV | 0.209               | 0.286 | 0.472 | 0.722 | 0.165                 | 0.253 | 0.389 | 0.389 |
| Gremlin    | 0.181               | 0.330 | 0.472 | 0.611 | 0.082                 | 0.121 | 0.250 | 0.389 |

(A)

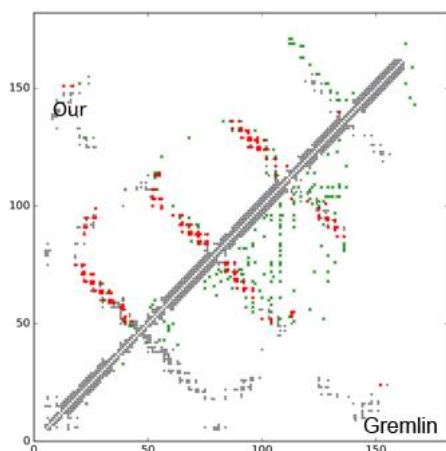

(B)

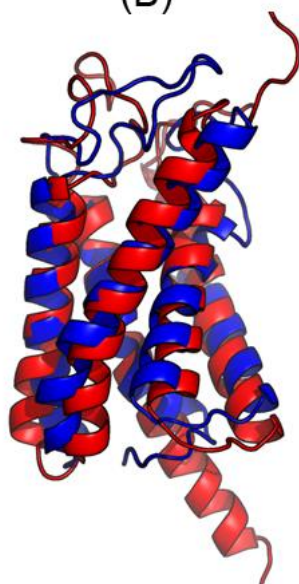

(D)

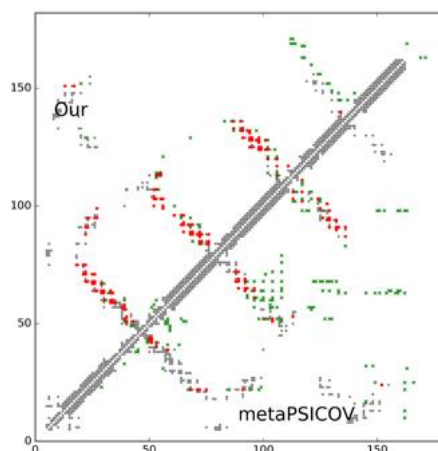

(C)

| Server Name | IDDT  | IDDT<br>C $\alpha$ |
|-------------|-------|--------------------|
| Server 60   | 53.58 | 63.47              |
| IntFOLD4-TS | 47.71 | 56.46              |
| Robetta     | 46.95 | 56.04              |
| SPARKS-X    | 43.95 | 53.09              |
| Server 0    | 38.83 | 46.11              |

(E)

**Supplemental Figure S9.** Case study of CAMEO target 5gufA. This protein is a CDP-archaeol synthase (CarS). (A) The long- and medium-range contact prediction accuracy of our methods, MetaPSICOV, and Gremlin. (B-C) The overlap between the native contact map and contact maps predicted by our method, Gremlin, and MetaPSICOV. Top L predicted all-range contacts are displayed. A gray, red, and green dot represents a native contact, a correct prediction, and a wrong prediction, respectively. (D) The superimposition between our predicted model (in red) and the native structure (in blue). (E) The list of top models submitted by CAMEO servers and their quality scores.

|            | Long range accuracy |       |       |       | Medium range accuracy |       |       |       |
|------------|---------------------|-------|-------|-------|-----------------------|-------|-------|-------|
|            | L                   | L/2   | L/5   | L/10  | L                     | L/2   | L/5   | L/10  |
| Our method | 0.697               | 0.881 | 0.970 | 1.000 | 0.042                 | 0.083 | 0.209 | 0.424 |
| metaPSICOV | 0.487               | 0.696 | 0.910 | 0.970 | 0.045                 | 0.089 | 0.194 | 0.364 |
| Gremlin    | 0.442               | 0.625 | 0.761 | 0.818 | 0.039                 | 0.077 | 0.194 | 0.364 |

(A)

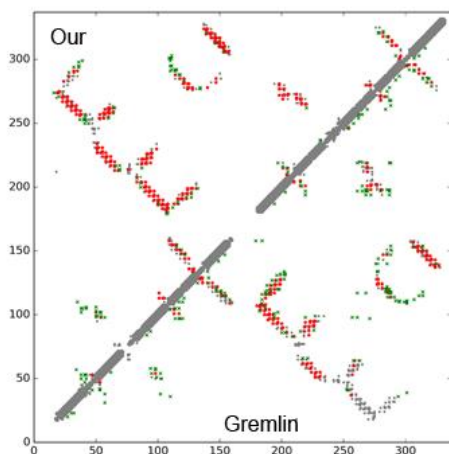

(B)

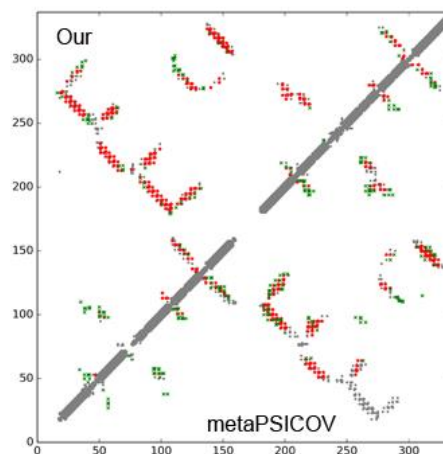

(C)

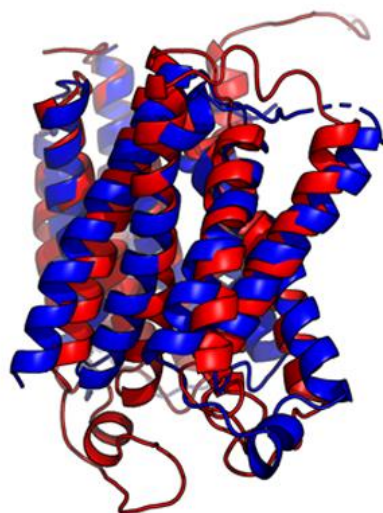

(D)

| Server Name | IDDT<br>Ca | IDDT<br>Ca |
|-------------|------------|------------|
| Robetta     | 61.56      | 69.16      |
| IntFOLD4-TS | 58.58      | 67.98      |
| Server 55   | 59.75      | 67.87      |
| Server 60   | 57.99      | 67.81      |
| SWISS-MODEL | 59.35      | 67.56      |

(E)

**Supplemental Figure S10.** Case study of CAMEO target 5ogkH. This protein is a nucleotide sugar transporter. (A) The long- and medium-range contact prediction accuracy of our methods, MetaPSICOV, and Gremlin. (B-C) The overlap between the native contact map and contact maps predicted by our method, Gremlin, and MetaPSICOV. Top L predicted all-range contacts are displayed. A gray, red, and green dot represents a native contact, a correct prediction, and a wrong prediction, respectively. (D) The superimposition between our predicted model (in red) and the native structure (in blue). (E) The list of top models submitted by CAMEO servers and their quality scores.

|            | Long range accuracy |       |       |       | Medium range accuracy |       |       |       |
|------------|---------------------|-------|-------|-------|-----------------------|-------|-------|-------|
|            | L                   | L/2   | L/5   | L/10  | L                     | L/2   | L/5   | L/10  |
| Our method | 0.408               | 0.612 | 0.912 | 1.000 | 0.205                 | 0.288 | 0.456 | 0.647 |
| metaPSICOV | 0.252               | 0.394 | 0.647 | 0.824 | 0.117                 | 0.188 | 0.353 | 0.471 |
| Gremlin    | 0.226               | 0.329 | 0.559 | 0.676 | 0.103                 | 0.182 | 0.353 | 0.500 |

(A)

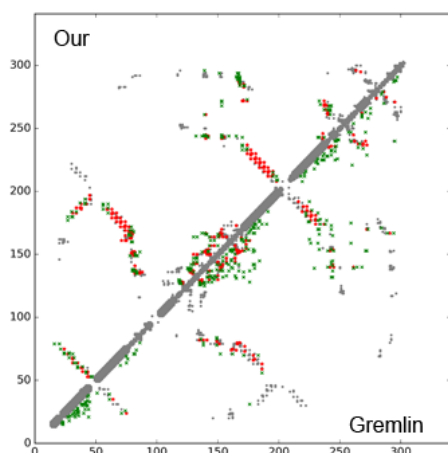

(B)

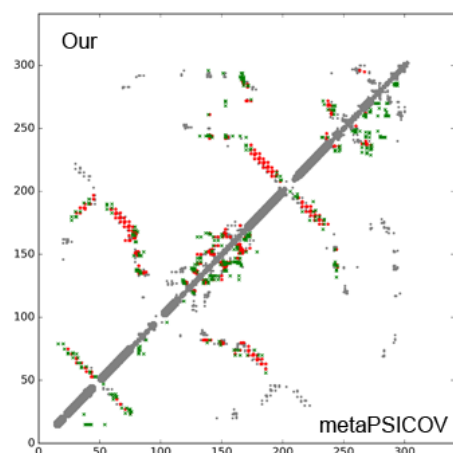

(C)

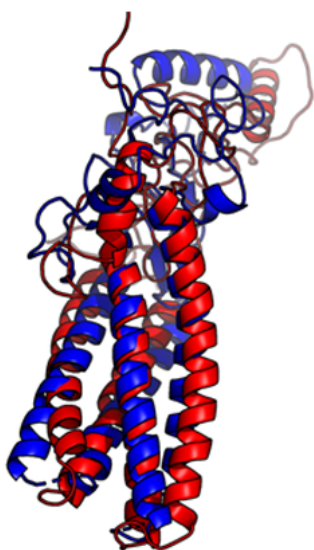

(D)

| Server Name                        | IDDT  | IDDT<br>Ca |
|------------------------------------|-------|------------|
| Server 60 <input type="checkbox"/> | 41.28 | 49.01      |
| Server 45 <input type="checkbox"/> | 32.81 | 37.92      |
| RaptorX <input type="checkbox"/>   | 30.09 | 35.21      |
| Robetta <input type="checkbox"/>   | 30.05 | 35.46      |
| Server 55 <input type="checkbox"/> | 29.39 | 34.98      |

(E)

**Supplemental Figure S11.** Case study of CAMEO target 6bmsB. This protein is a DHHC (Asp-His-His-Cys) palmitoyltransferases. (A) The long- and medium-range contact prediction accuracy of our methods, MetaPSICOV, and Gremlin. (B-C) The overlap between the native contact map and contact maps predicted by our method, Gremlin, and MetaPSICOV. Top L predicted all-range contacts are displayed. A gray, red, and green dot represents a native contact, a correct prediction, and a wrong prediction, respectively. (D) The superimposition between our predicted model (in red) and the native structure (in blue). (E) The list of top models submitted by CAMEO servers and their quality scores.



|            | Long range accuracy |       |       |       | Medium range accuracy |       |       |       |
|------------|---------------------|-------|-------|-------|-----------------------|-------|-------|-------|
|            | L                   | L/2   | L/5   | L/10  | L                     | L/2   | L/5   | L/10  |
| Our method | 0.207               | 0.293 | 0.413 | 0.435 | 0.004                 | 0.009 | 0.000 | 0.000 |
| metaPSICOV | 0.168               | 0.259 | 0.326 | 0.391 | 0.004                 | 0.009 | 0.000 | 0.000 |
| Gremlin    | 0.099               | 0.155 | 0.283 | 0.435 | 0.000                 | 0.000 | 0.000 | 0.000 |

(A)

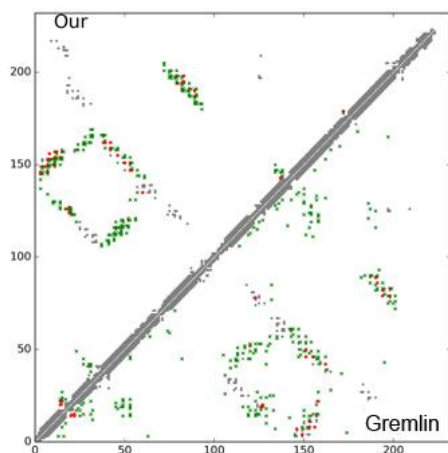

(B)

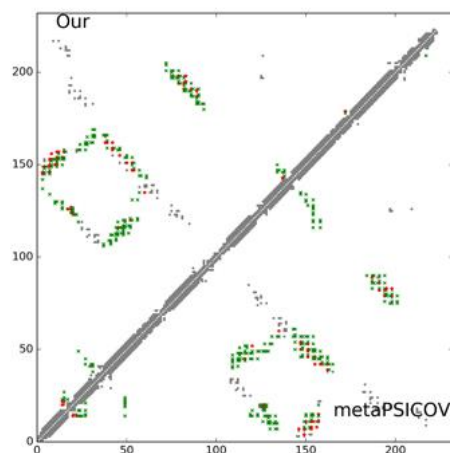

(C)

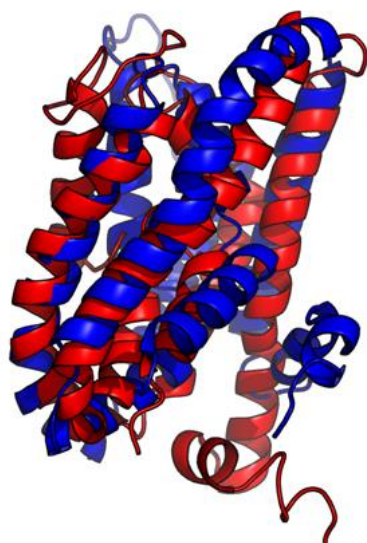

(D)

| Server Name | IDDT  | IDDT C $\alpha$ |
|-------------|-------|-----------------|
| Server 60   | 44.60 | 50.47           |
| Robetta     | 43.88 | 49.44           |
| Server 71   | 40.06 | 46.20           |
| IntFOLD4-TS | 34.42 | 38.59           |
| Server 45   | 33.36 | 37.87           |

(E)

**Supplemental Figure S12.** Case study of CAMEO target 5vkva. This protein is the membrane electron transporter CcdA. (A) The long- and medium-range contact prediction accuracy of our methods, MetaPSICOV, and Gremlin. (B-C) The overlap between the native contact map and contact maps predicted by our method, Gremlin, and MetaPSICOV. Top L predicted all-range contacts are displayed. A gray, red, and green dot represents a native contact, a correct prediction, and a wrong prediction, respectively. (D) The superimposition between our predicted model (in red) and the native structure (in blue). (E) The list of top models submitted by CAMEO servers and their quality scores.

## S5 Estimation of the 3D modeling accuracy

We performed a statistical study to show the relationship between 3D model quality and the number of effective sequence homologs (i.e.,  $M_{eff}$ ) using 356 multi-pass helical MPs from the 510 dataset (as shown in Table S1).

We used  $M_{eff}$  to measure the amount of homologous information in an MSA (multiple sequence alignment). It can be interpreted as the number of non-redundant (or effective) sequence homologs in an MSA when 70% sequence identity is used as cutoff [20].

We measured the quality of a 3D model by TM-score [21], which ranges from 0 to 1 indicating the worst and the best quality, respectively. A 3D model with  $TM\text{-score} \geq 0.6$  is likely to have a correct fold while a 3D model with  $TM\text{-score} < 0.5$  usually does not.  $TM\text{-score} = 0.5$  is also used by the community as a cutoff to judge if a model has a correct fold or not [22].

Figure S13 shows the TM-score of the 356 MPs with respect to the length-normalized  $M_{eff}$  (or,  $N_{eff}$  which is defined as  $M_{eff}/L^{0.7}$ ). When  $\ln(N_{eff})$  is larger than 1.5 and 3.5, the predicted models on average have  $TM\text{-score} > 0.5$  and  $> 0.6$ , respectively.

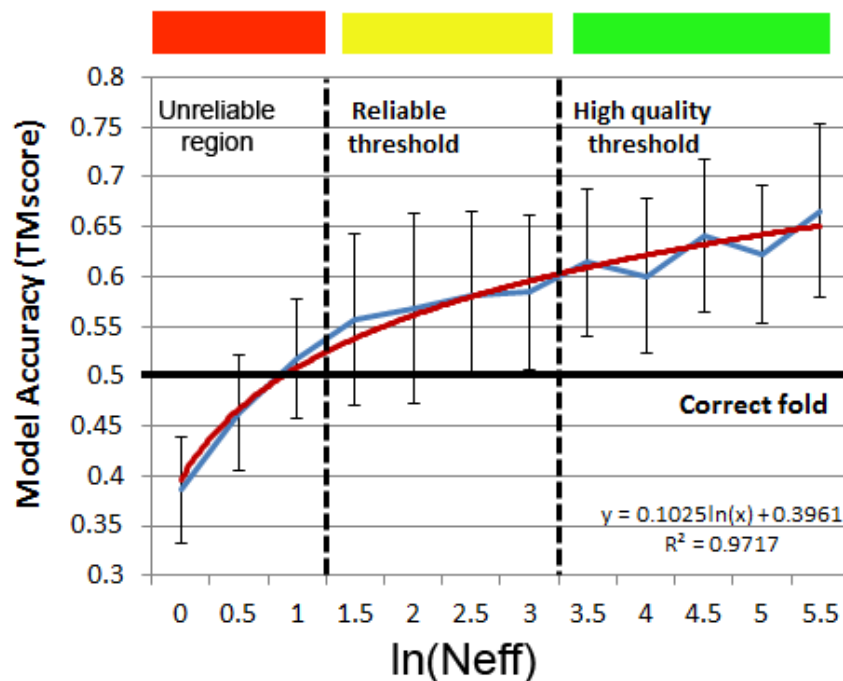

**Supplemental Figure S13.** 3D modeling accuracy of transmembrane proteins (measured by TM-score) with respect to the number of effective sequence homologs in MSA (measured by  $N_{eff}$  defined as  $M_{eff}/L^{0.7}$ ). The blue curve shows the mean and standard deviation at each  $\ln(N_{eff})$  bin at 0.5 unit, whereas the red line is a fitted curve of the blue curve.

# S6 Input/output explanation of the PredMP server

## Input of the PredMP server

### FOLD YOUR MEMBRANE PROTEIN

The image shows a web form titled "FOLD YOUR MEMBRANE PROTEIN". It has two input fields: "Sequence" and "Email Address (Optional)". The "Sequence" field is a large empty text box with a red border, and the "Email Address (Optional)" field is a smaller text box with a red border and an email icon on the left. Below the "Email Address" field are two buttons: a blue "Submit" button and a grey "Fill in Example" button. A red arrow points from the "Sequence" field to the text "An input sequence". Another red arrow points from the "Email Address" field to the text "Input email (optional)". A green arrow points from the "Submit" button to the text "Submit the job!". A purple arrow points from the "Fill in Example" button to the text "An example".

**Supplemental Figure S14.** The only required input of PredMP is the membrane protein sequence. The "Job Submission" section also allows users to provide an email address to be used for notification when the job is done. An email is not required, but strongly recommended since it can be used to retrieve the results of your job.

---

## Output of the PredMP server

The outputs of the PredMP server include:

- 1) Five full-length *de novo* constructed 3D models of the input membrane protein sequence. These models are ranked according to the energy function of Crystallography & NMR System (CNS) [4]. These models are then embedded into the bilayer membrane by the Positioning of Proteins in Membranes (PPM) method [23], as shown in Figure S15.
- 2) Estimated accuracy of the predicted 3D models in three categories: high confidence, medium confidence, and low confidence. The confidence score is calculate based on Neff (defined as  $N_{eff}/L^{0.7}$ ) which measures the amount of homologous information in the multiple sequence alignment (MSA), as explained in Figure S13.

3) 1D annotation of local structural properties, including the predicted secondary structure, the disordered region, and the transmembrane topology, as illustrated in Figure S16.

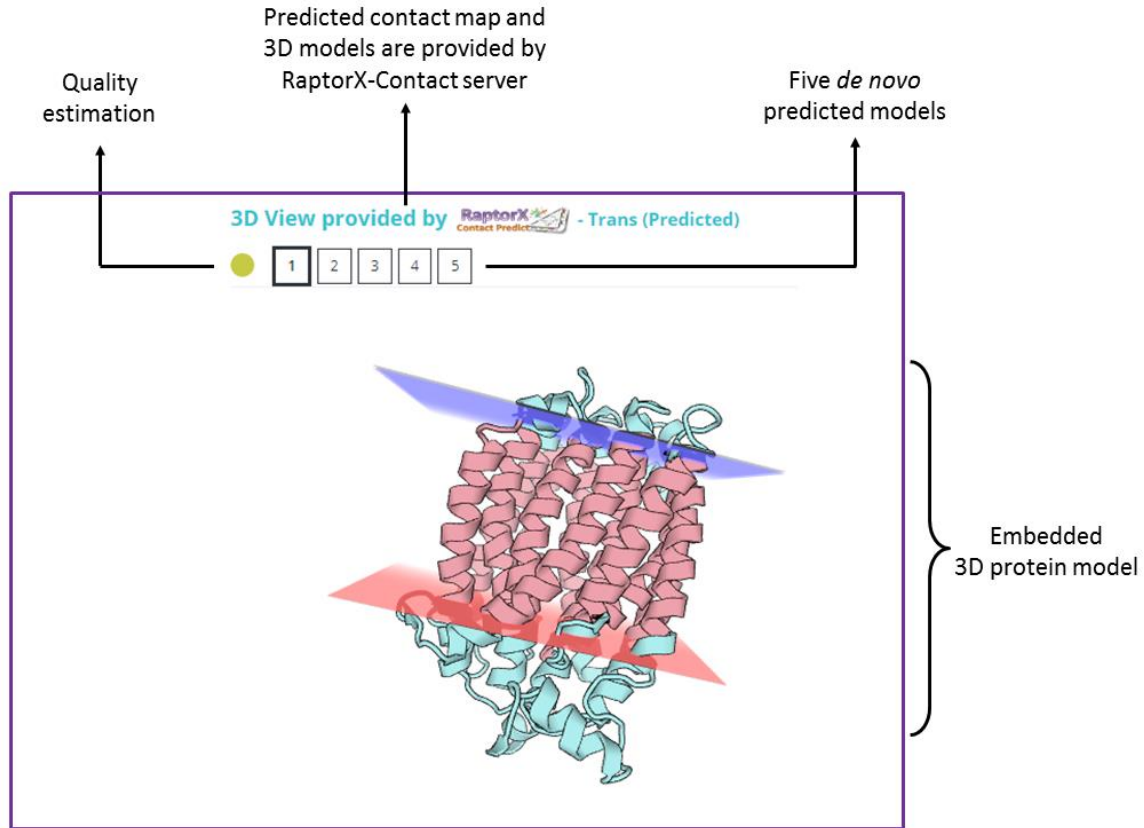

**Supplemental Figure S15.** The result page of the PredMP server for the 3D model prediction followed by the embedding into the bilayer membrane. PredMP will remotely call RaptorX-Contact server to provide five full-length *de novo* constructed 3D models of the input membrane protein sequence. PredMP also estimates the accuracy of the predicted 3D models in three categories: high confidence (in green), medium confidence (in yellow), and low confidence (in red), respectively.

**Summary prediction result:**

1<sup>st</sup> line shows the result of order/disorder regions prediction ,  
2<sup>nd</sup> line shows the result of transmembrane topology prediction ,  
3<sup>rd</sup> line shows the result of 3-state secondary structure prediction.

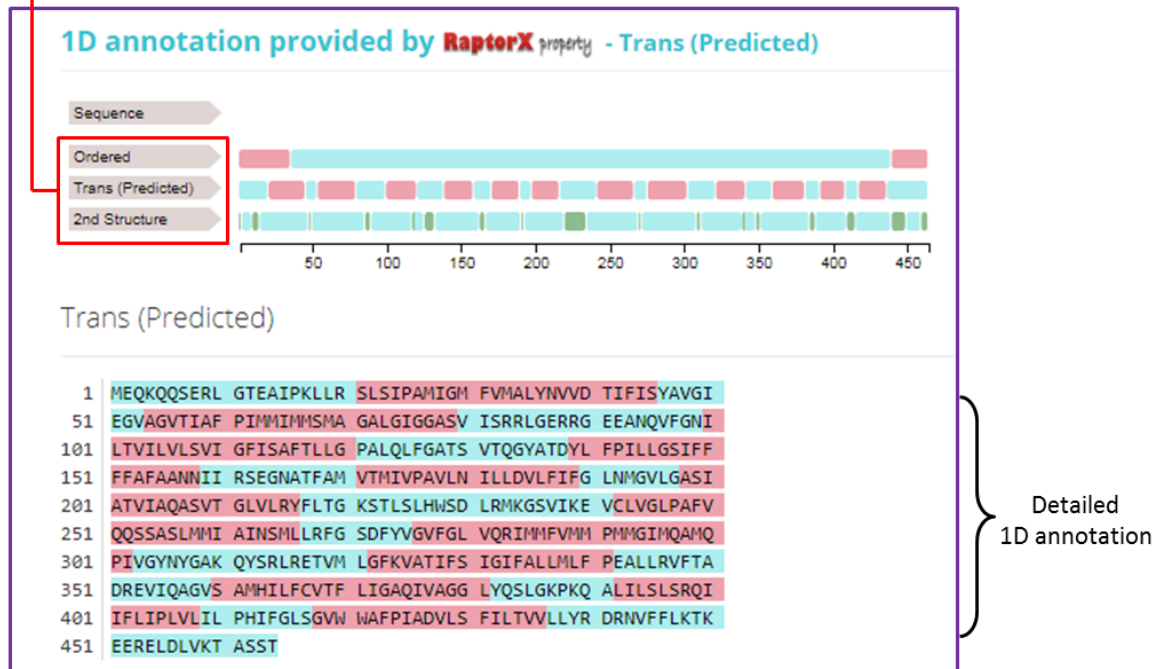

**Supplemental Figure S16.** The result page of the PredMP server for the 1D annotation of local structural properties. PredMP will remotely call RaptorX-Property server to provide these local structural properties. Specifically, the upper section shows the summary predicted results, with the first row showing the result of order/disorder regions, and the remaining rows showing the prediction of transmembrane topology, and 3-state secondary structure, respectively. By clicking on a specific summary result, such as the predicted transmembrane topology, the detailed annotation on the input sequence is shown in the lower section.

## References

1. Remmert, M., et al., *HHblits: lightning-fast iterative protein sequence searching by HMM-HMM alignment*. *Nature methods*, 2012. **9**(2): p. 173.
2. Wang, S., et al., *RaptorX-Property: a web server for protein structure property prediction*. *Nucleic acids research*, 2016. **44**(W1): p. W430-W435.
3. Wang, S., et al., *Folding membrane proteins by deep transfer learning*. *Cell systems*, 2017. **5**(3): p. 202-211. e3.
4. Brunger, A.T., et al., *Crystallography & NMR system: A new software suite for macromolecular structure determination*. *Acta Crystallographica-Section D-Biological Crystallography*, 1998. **54**(5): p. 905-921.
5. Wang, S., et al., *CoinFold: a web server for protein contact prediction and contact-assisted protein folding*. *Nucleic acids research*, 2016. **44**(W1): p. W361-W366.
6. Wang, S., J. Ma, and J. Xu, *AUCpreD: proteome-level protein disorder prediction by AUC-maximized deep convolutional neural fields*. *Bioinformatics*, 2016. **32**(17): p. i672-i679.
7. Kozma, D., I. Simon, and G.E. Tusnady, *PDBTM: Protein Data Bank of transmembrane proteins after 8 years*. *Nucleic acids research*, 2012. **41**(D1): p. D524-D529.
8. Wang, S., et al., *DeepCNF-D: predicting protein order/disorder regions by weighted deep convolutional neural fields*. *International journal of molecular sciences*, 2015. **16**(8): p. 17315-17330.
9. Wang, S., et al., *Protein secondary structure prediction using deep convolutional neural fields*. *Scientific reports*, 2016. **6**: p. 18962.
10. Lafferty, J., A. McCallum, and F.C. Pereira, *Conditional random fields: Probabilistic models for segmenting and labeling sequence data*. 2001.
11. Krizhevsky, A., I. Sutskever, and G.E. Hinton. *Imagenet classification with deep convolutional neural networks*. in *Advances in neural information processing systems*. 2012.
12. Altschul, S.F., et al., *Gapped BLAST and PSI-BLAST: a new generation of protein database search programs*. *Nucleic acids research*, 1997. **25**(17): p. 3389-3402.
13. Bairoch, A., et al., *The universal protein resource (UniProt)*. *Nucleic acids research*, 2005. **33**(suppl\_1): p. D154-D159.
14. Bernsel, A., et al., *TOPCONS: consensus prediction of membrane protein topology*. *Nucleic acids research*, 2009. **37**(suppl\_2): p. W465-W468.
15. Nugent, T. and D.T. Jones, *Transmembrane protein topology prediction using support vector machines*. *BMC bioinformatics*, 2009. **10**(1): p. 159.
16. Käll, L., A. Krogh, and E.L. Sonnhammer, *A combined transmembrane topology and signal peptide prediction method*. *Journal of molecular biology*, 2004. **338**(5): p. 1027-1036.
17. Viklund, H. and A. Elofsson, *OCTOPUS: improving topology prediction by two-track ANN-based preference scores and an extended topological grammar*. *Bioinformatics*, 2008. **24**(15): p. 1662-1668.
18. Haas, J., et al., *The Protein Model Portal—a comprehensive resource for protein structure and model information*. *Database*, 2013. **2013**.
19. Schaarschmidt, J., et al., *Assessment of contact predictions in CASP12: co - evolution and deep learning coming of age*. *Proteins: Structure, Function, and Bioinformatics*, 2017.
20. Wang, S., et al., *Accurate de novo prediction of protein contact map by ultra-deep learning model*. *PLoS computational biology*, 2017. **13**(1): p. e1005324.

21. Zhang, Y. and J. Skolnick, *Scoring function for automated assessment of protein structure template quality*. Proteins: Structure, Function, and Bioinformatics, 2004. **57**(4): p. 702-710.
22. Xu, J. and Y. Zhang, *How significant is a protein structure similarity with TM-score= 0.5?* Bioinformatics, 2010. **26**(7): p. 889-895.
23. Lomize, A.L., et al., *Positioning of proteins in membranes: a computational approach*. Protein science, 2006. **15**(6): p. 1318-1333.
